# Supplementary material
Source: MDPI journal article supplement (https://www.mdpi.com/2071-1050/13/12/6604)
Supplement: s1 [file s1]

Supplementary Materials for

**Estimating the Economic Level of Water Losses (ELWL) in the Water Distribution System of  
the City of Malang, Indonesia**

Tri Heryanto<sup>1</sup>, Saroj K. Sharma<sup>1</sup>, D. Daniel<sup>2,3\*</sup>, Maria Kennedy<sup>1,2</sup>

<sup>1</sup> Department of Water Supply, Sanitation, and Environmental Engineering, IHE Delft Institute for Water Education, 2611 AX Delft, the Netherlands

<sup>2</sup> Department of Water Management, Faculty of Civil Engineering and Geosciences, Delft University of Technology, 2628 CN Delft, the Netherlands

<sup>3</sup> Department of Health Behavior, Faculty of Medicine, Public Health and Nursing, Universitas Gadjah Mada, Environment, and Social Medicine, Yogyakarta 55281, Indonesia

\*Corresponding author: [d.daniel@tudelft.nl](mailto:d.daniel@tudelft.nl); [danielhombing@gmail.com](mailto:danielhombing@gmail.com)

**This PDF file includes:**

- S1. Cost for reducing real losses
- S2. ELL Calculation
- S3. ELAL Calculation
- S4. ELWL Calculation
- S5. Sensitivity Analysis

## **S1. Cost for reducing real losses**

### **A. Operational Cost**

The step test was conducted every week: one group was sent for the east region and the other group for the west region. The step test team consisted of internal staff and plumbers (outsourcing workers). The number of internal and outsourcing staff assigned for step test from 2011 – 2015 is shown in table S1. The internal staff were paid monthly, and the outsourcing staff were paid daily. Before the step test was performed, another group of plumbers performed the valve installation.

*Table S1. Active Leakage Detection Operational Cost: PDAM Kota Malang*

| Item                                                | Year          |               |               |               |               |
|-----------------------------------------------------|---------------|---------------|---------------|---------------|---------------|
|                                                     | 2011          | 2012          | 2013          | 2014          | 2015          |
| Internal Staff                                      | 3             | 4             | 4             | 4             | 6             |
| Total cost/month for internal staff (EUR)           | 1,508         | 2,212         | 2,354         | 2,354         | 3,381         |
| Outsourcing workers                                 | 2             | 2             | 4             | 4             | 4             |
| Daily cost for outsourcing workers/day (EUR)        | 4.33          | 4.67          | 4.67          | 5.33          | 6.00          |
| Overtime cost for outsourcing/hour (EUR)            | 0.67          | 0.67          | 0.67          | 0.67          | 0.67          |
| Meal cost for overtime/day (EUR)                    | 1.00          | 1.00          | 1.00          | 1.33          | 1.33          |
| Total cost/month for outsourcing (IDR)              | 98.7          | 104.0         | 208.0         | 234.7         | 256.0         |
| Outsourcing workers for installing valve before ALC | 6             | 6             | 6             | 8             | 10            |
| Total cost/month for installing valve               | 528.00        | 560.00        | 560.00        | 853.33        | 1,173.33      |
| <b>Labour Cost for ALC/year</b>                     | <b>25,615</b> | <b>34,517</b> | <b>37,459</b> | <b>41,299</b> | <b>57,729</b> |
| Vehicles (rent) (EUR)/year                          | 467           | 467           | 533           | 533           | 600           |
| Fuel (EUR)/year                                     | 1280          | 1280          | 1440          | 1440          | 1600          |
| Training cost (EUR/year)                            | 400           | 533           | 533           | 533           | 800           |
| <b>Total ALC Operational Cost (EUR)</b>             | <b>27,761</b> | <b>36,797</b> | <b>39,966</b> | <b>43,806</b> | <b>60,729</b> |

\*Exchange rate Euro/Rp = 15,000

In every step test, the outsourcing workers worked for two days: one day for the step test only and the second day to repair the leaks. The overtime hours were estimated to 4 hours for step test activity and every personnel got one meal. Installing the valves is estimated to need 4 days. With all of these estimations and the value for the daily cost of outsourcing workers, overtime and meal costs obtained from the financial department, the labour costs for one year were calculated as shown in table S1.

Each group (East Region and West Region) had one car that was rented from Koperasi. The rent and fuel costs which were obtained from the financial department are depicted in table S1. By summing up the labour cost, vehicle cost, fuel cost and training cost, the annual operational cost can be calculated.

## **B. Investment Cost**

On the other hand, there is also the investment cost related to the activity to reduce the physical losses. The investment for the DMA establishment contributes to the active leakage detection activities and pressure management. The investment cost for leakage detection equipment was also considered. The investment cost was spread based on the lifetime of the equipment. For DMA, the lifetime was estimated from the equipment with the highest cost (PRV); that is, 5 years. The leakage detection equipment's lifetime was estimated to be 10 years.

The investment costs for DMA establishment were estimated from the number of DMA created each year and the average cost to build one DMA. From the waterworks, the estimated cost to build one DMA was 16,667 EUR. The total investment costs for one year were spread to the next five years, and this became the average annual costs. The number of DMA established each year, the investment costs and the annual costs for DMA are shown in table S2.

*Table S2. DMA cost: PDAM Kota Malang*

| Item/Year     | 2011 | 2012 | 2013 | 2014 | 2015 |
|---------------|------|------|------|------|------|
| Number of DMA | 12   | 20   | 40   | 47   | 16   |

|                        |         |         |         |         |         |
|------------------------|---------|---------|---------|---------|---------|
| Investment costs (EUR) | 200,000 | 333,333 | 666,667 | 783,333 | 266,667 |
| Annual costs (EUR)     | 40,000  | 106,667 | 240,000 | 396,667 | 450,000 |

In every step test, one step test team used one set of leakage detection equipment (one multipoint correlator and one ground microphone). PDAM Kota Malang bought the multipoint correlator in 2014 and five ground microphones in different years (one in 2011, one in 2014 and three in 2015). The investment costs for the leakage detection equipment are spread for the next 10 years, as shown in table S3.

*Table S3. Leakage detection equipment cost: PDAM Kota Malang*

| Item/Year                                  | 2011   | 2012  | 2013  | 2014   | 2015   |
|--------------------------------------------|--------|-------|-------|--------|--------|
| Price of leakage detection equipment (EUR) | 10,000 | -     | -     | 10,000 | 20,000 |
| Annual cost (EUR)                          | 1,000  | 1,000 | 1,000 | 2,000  | 4,000  |

Another associated cost related to the reduction of real losses is the maintenance of the transmission and distribution pipes. For this data, the financial division of PDAM Kota Malang did not separate the costs that were directly related to leakage reduction and the costs that were not directly related. All of the costs for the maintenance of the distribution pipes were assumed to be directly related to the leakage reduction. The total cost for the reduction of the real losses are summarized in Table S4.

*Table S4. Cost for controlling the real losses: PDAM Kota Malang*

| Item/Year                                        | 2011           | 2012           | 2013           | 2014           | 2015           |
|--------------------------------------------------|----------------|----------------|----------------|----------------|----------------|
| Active leakage detection cost (EUR)              | 27,761         | 36,797         | 39,966         | 43,806         | 60,729         |
| Annual DMA cost (EUR)                            | 40,000         | 106,667        | 240,000        | 396,667        | 450,000        |
| Leakage detector equipment (EUR)                 | 1,000          | 1,000          | 1,000          | 2,000          | 4,000          |
| Maintenance for distribution pipe (EUR)          | 316,381        | 327,682        | 380,209        | 306,737        | 442,659        |
| <b>Annual Cost for Real Loss Reduction (EUR)</b> | <b>385,142</b> | <b>472,145</b> | <b>661,175</b> | <b>749,209</b> | <b>957,388</b> |



## S2. ELL Calculation

### A. Total Cost Method: ELL

*Table S5. Cost of the lost water from real losses and total cost: PDAM Kota Malang*

| Item                                      | Year             |                  |                  |                  |                  |
|-------------------------------------------|------------------|------------------|------------------|------------------|------------------|
|                                           | 2011             | 2012             | 2013             | 2014             | 2015             |
| Real losses (m <sup>3</sup> /year)        | 9,320,882        | 8,629,240        | 8,048,657        | 5,928,759        | 4,604,143        |
| <b>Cost of water lost from RL (EUR)</b>   | <b>2,423,429</b> | <b>2,243,602</b> | <b>2,092,651</b> | <b>1,541,477</b> | <b>1,197,077</b> |
| <b>Real Loss Control Cost (EUR)</b>       | <b>385,142</b>   | <b>472,145</b>   | <b>661,175</b>   | <b>749,209</b>   | <b>957,388</b>   |
| Number of house connections               | 106,578          | 116,184          | 125,614          | 134,630          | 140,320          |
| RL/connection (m <sup>3</sup> /conn/year) | 134.94           | 104.44           | 87.76            | 71.89            | 62.89            |
| <b>Total Cost (EUR)</b>                   | <b>2,808,571</b> | <b>2,715,747</b> | <b>2,753,826</b> | <b>2,290,687</b> | <b>2,154,465</b> |

*Table S6. Extended calculation based on the curve equation for the real loss control cost, the cost of lost water and the total cost.*

|                                                 |       |       |       |       |       |       |       |       |
|-------------------------------------------------|-------|-------|-------|-------|-------|-------|-------|-------|
| Real Loss Volume (million m <sup>3</sup> /year) | 2,00  | 3,00  | 4,00  | 4,60  | 5,93  | 8,05  | 8,63  | 9,32  |
| Real loss control cost (thousand EUR)           | 2.590 | 1.630 | 1.174 | 957   | 749   | 661   | 472   | 385   |
| Cost of lost water from real loss(thousand EUR) | 520   | 780   | 1.040 | 1.197 | 1.541 | 2.093 | 2.244 | 2.423 |
| Total cost (thousand EUR)                       | 3.110 | 2.410 | 2.214 | 2.154 | 2.291 | 2.754 | 2.716 | 2.809 |



## B. Marginal Cost Method: ELL

Table S7. Marginal cost of real loss reduction

| Item                                        | 2011      | 2012      | 2013      | 2014      | 2015      |
|---------------------------------------------|-----------|-----------|-----------|-----------|-----------|
| Real loss Control Cost (EUR)                | 385.142   | 472.145   | 661.175   | 749.209   | 957.388   |
| Incremental control cost (EUR)              |           | 87.003    | 189.030   | 88.034    | 208.179   |
| Volume of real loss (m3/year)               | 9.320.882 | 8.629.240 | 8.048.657 | 5.928.759 | 4.604.143 |
| Volume of real loss (million m3/year)       | 9,32      | 8,63      | 8,05      | 5,93      | 4,60      |
| Real loss reduction over previous year (m3) | -         | 691.642   | 580.583   | 2.119.898 | 1.324.616 |
| Marginal cost of real loss reduction        | -         | 0,126     | 0,326     | 0,042     | 0,157     |

Figure S1. Marginal cost of real loss reduction curve

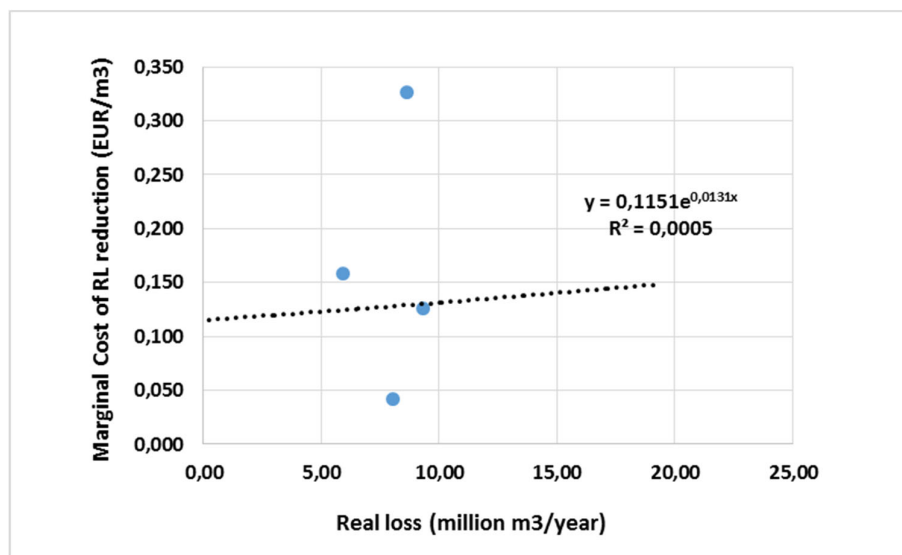

## C. Cumulative Cost–Benefit Method - ELL

Table S8. The cumulative benefit and cost for real loss reduction

| Item/Year                | 2011    | 2012    | 2013      | 2014      | 2015      |
|--------------------------|---------|---------|-----------|-----------|-----------|
| Total Benefit (EUR)      | 218,684 | 246,031 | 274,958   | 257,499   | 186,191   |
| Cumulative benefit (EUR) |         | 464,716 | 739,674   | 997,173   | 1,183,364 |
| Total Cost (EUR)         | 385,142 | 472,145 | 661,175   | 749,209   | 957,388   |
| Cumulative cost (EUR)    |         | 857,287 | 1,518,462 | 2,267,672 | 3,225,060 |



Figure S2. ELL Estimation with the Cumulative Cost and Benefit method

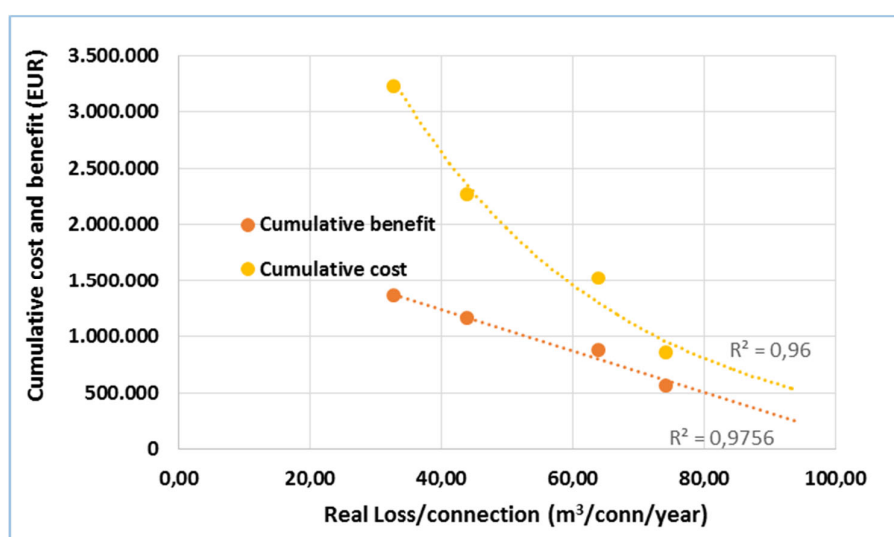

### S3. ELAL Calculation

Table S9. Optimum meter replacement period calculation

| Year | Weighted error | Cost of Lost Water | Cumulative Cost of Lost Water | Annual Cost of Lost Water | Annual Cost of Meter | Total Annual Cost |
|------|----------------|--------------------|-------------------------------|---------------------------|----------------------|-------------------|
| 1    | 0.10%          | €0.08              | €0.08                         | €0.08                     | €32.67               | €32.75            |
| 2    | 0.20%          | 0.163              | €0.24                         | €0.12                     | €16.33               | €16.46            |
| 3    | 0.30%          | 0.245              | €0.49                         | €0.16                     | €10.89               | €11.05            |
| 4    | 0.50%          | 0.408              | €0.90                         | €0.22                     | €8.17                | €8.39             |

|    |        |        |        |       |       |       |
|----|--------|--------|--------|-------|-------|-------|
| 5  | 0.80%  | 0.653  | €1.55  | €0.31 | €6.53 | €6.84 |
| 6  | 3.00%  | 2.448  | €4.00  | €0.67 | €5.44 | €6.11 |
| 7  | 5.00%  | 4.080  | €8.08  | €1.15 | €4.67 | €5.82 |
| 8  | 7.50%  | 6.120  | €14.20 | €1.77 | €4.08 | €5.86 |
| 9  | 9.00%  | 7.344  | €21.54 | €2.39 | €3.63 | €6.02 |
| 10 | 11.00% | 8.976  | €30.52 | €3.05 | €3.27 | €6.32 |
| 11 | 13.00% | 10.608 | €41.13 | €3.74 | €2.97 | €6.71 |

#### S4. ELWL Calculation

##### A. Total Cost Method: ELWL

Table S10. Water loss control cost

| Cost (EUR)                              | Year           |                |                |                |                  |
|-----------------------------------------|----------------|----------------|----------------|----------------|------------------|
|                                         | 2011           | 2012           | 2013           | 2014           | 2015             |
| Active Leakage Detection (Step Test)    | 27,761         | 36,797         | 39,966         | 43,806         | 60,729           |
| Maintenance of distribution pipe        | 316,381        | 327,682        | 380,209        | 306,737        | 442,659          |
| Leakage Detection Equipment             | 1,000          | 1,000          | 1,000          | 2,000          | 4,000            |
| DMA Annual Cost                         | 40,000         | 106,667        | 240,000        | 396,667        | 450,000          |
| Meter Replacement                       | -              | 19,721         | 112,882        | 206,043        | 299,204          |
| Software for meter reading with android | -              | -              | 2,000          | 2,000          | 2,000            |
| <b>Water Loss control cost (EUR)</b>    | <b>385,142</b> | <b>491,866</b> | <b>776,057</b> | <b>957,252</b> | <b>1,258,592</b> |

Table S11. Water loss and the cost of the lost water

| Item | Year |      |      |      |      |
|------|------|------|------|------|------|
|      | 2011 | 2012 | 2013 | 2014 | 2015 |

|                                         |                  |                  |                  |                  |                  |
|-----------------------------------------|------------------|------------------|------------------|------------------|------------------|
| Water loss (%)                          | 36.69%           | 29.99%           | 26.97%           | 22.61%           | 20.42%           |
| Water loss (m3/year)                    | 14,382,067       | 12,133,866       | 11,023,529       | 9,678,697        | 8,824,725        |
| Water loss/connection<br>(m3/conn/year) | 134.94           | 104.44           | 87.76            | 71.89            | 62.89            |
| <b>Cost of Water Lost (EUR)</b>         | <b>4,889,903</b> | <b>4,125,514</b> | <b>3,748,000</b> | <b>3,290,757</b> | <b>3,000,407</b> |

*Table S12. Extended calculation based on the curve equation for the water loss control cost, the cost of lost water and the total cost*

|                                   |        |       |       |       |       |       |       |       |       |          |          |       |       |       |       |        |        |
|-----------------------------------|--------|-------|-------|-------|-------|-------|-------|-------|-------|----------|----------|-------|-------|-------|-------|--------|--------|
| WL/connection (m3/conn/year)      | 15.00  | 20    | 30    | 40    | 50    | 62.89 | 64    | 65    | 66    | 67       | 68       | 69    | 70    | 71.89 | 87.76 | 104.44 | 134.94 |
| WL control cost (thousand EUR)    | 11,814 | 7,499 | 3,952 | 2,508 | 1,763 | 1,227 | 1,194 | 1,165 | 1,137 | 1,110    | 1,085    | 1,060 | 1,036 | 993   | 725   | 551    | 367    |
| Cost of water lost (thousand EUR) | 1,808  | 1,938 | 2,196 | 2,455 | 2,714 | 3,048 | 3,076 | 3,102 | 3,128 | 3,154    | 3,180    | 3,206 | 3,232 | 3,281 | 3,691 | 4,123  | 4,912  |
| Total cost (thousand EUR)         | 13,622 | 9,437 | 6,148 | 4,964 | 4,477 | 4,275 | 4,270 | 4,267 | 4,265 | 4,264.26 | 4,264.46 | 4,266 | 4,268 | 4,274 | 4,416 | 4,673  | 5,280  |

## B. Cumulative Cost-Benefit Method: ELWL

*Table S13. Cumulative cost and benefit*

| Item | Year |      |      |      |      |
|------|------|------|------|------|------|
|      | 2011 | 2012 | 2013 | 2014 | 2015 |

|                                                   |            |            |            |           |           |
|---------------------------------------------------|------------|------------|------------|-----------|-----------|
| <b>Cumulative cost</b>                            |            |            |            |           |           |
| Water Loss control cost (EUR)                     | 385,142    | 491,866    | 776,057    | 957,252   | 1,258,592 |
| Cumulative control cost (EUR)                     | 385,142    | 877,008    | 1,653,065  | 2,610,317 | 3,868,909 |
| <b>Cumulative benefit</b>                         |            |            |            |           |           |
| Water Loss (m3/year)                              | 14,382,067 | 12,133,866 | 11,023,529 | 9,678,697 | 8,824,725 |
| Water Loss reduction over previous year (m3/year) | -          | 2,248,201  | 1,110,337  | 1,344,832 | 853,972   |
| Cumulative WL Reduction (m3/year)                 | -          | 2,248,201  | 3,358,538  | 4,703,370 | 5,557,342 |
| Marginal cost of water (EUR/m3)                   | -          | 0.260      | 0.260      | 0.260     | 0.260     |
| Cumulative benefit                                | -          | 584,532    | 873,220    | 1,222,876 | 1,444,909 |

## S5. Sensitivity Analysis

### A. Sensitivity analysis of ELWL: Total cost method

Water tariff decrease 20%

|                                |       |       |       |       |       |     |     |     |     |     |
|--------------------------------|-------|-------|-------|-------|-------|-----|-----|-----|-----|-----|
| WL/connection (m3/conn/year)   | 67    | 68    | 69    | 70    | 71    | 72  | 73  | 74  | 75  | 76  |
| WL control cost (thousand EUR) | 1,110 | 1,085 | 1,060 | 1,036 | 1,013 | 993 | 970 | 949 | 929 | 910 |

|                                    |       |       |       |       |       |       |         |         |       |       |
|------------------------------------|-------|-------|-------|-------|-------|-------|---------|---------|-------|-------|
| Value of water lost (thousand EUR) | 2,523 | 2,544 | 2,565 | 2,585 | 2,606 | 2,624 | 2,647   | 2,668   | 2,689 | 2,710 |
| Total cost (thousand EUR)          | 3,633 | 3,628 | 3,624 | 3,621 | 3,619 | 3,618 | 3,617.0 | 3,617.1 | 3,618 | 3,619 |

Water tariff decrease 10%

|                                    |       |       |       |       |       |       |       |       |       |       |
|------------------------------------|-------|-------|-------|-------|-------|-------|-------|-------|-------|-------|
| WL/connection (m3/conn/year)       | 67    | 68    | 69    | 70    | 71    | 72    | 73    | 74    | 75    | 76    |
| WL control cost (thousand EUR)     | 1,110 | 1,085 | 1,060 | 1,036 | 1,013 | 993   | 970   | 949   | 929   | 910   |
| Value of water lost (thousand EUR) | 2,839 | 2,862 | 2,885 | 2,908 | 2,932 | 2,952 | 2,978 | 3,002 | 3,025 | 3,048 |
| Total cost (thousand EUR)          | 3,949 | 3,946 | 3,945 | 3,944 | 3,945 | 3,946 | 3,948 | 3,951 | 3,954 | 3,958 |

Water tariff increase 10%

|                                    |       |       |       |       |       |       |       |       |       |       |
|------------------------------------|-------|-------|-------|-------|-------|-------|-------|-------|-------|-------|
| WL/connection (m3/conn/year)       | 61    | 62    | 63    | 64    | 65    | 66    | 67    | 68    | 69    | 70    |
| WL control cost (thousand EUR)     | 1,288 | 1,255 | 1,224 | 1,194 | 1,165 | 1,137 | 1,110 | 1,085 | 1,060 | 1,036 |
| Value of water lost (thousand EUR) | 3,299 | 3,327 | 3,356 | 3,384 | 3,412 | 3,441 | 3,469 | 3,498 | 3,526 | 3,555 |
| Total cost (thousand EUR)          | 4,586 | 4,582 | 4,579 | 4,578 | 4,577 | 4,578 | 4,580 | 4,582 | 4,586 | 4,591 |

Water tariff increase 20%

|                              |    |    |    |    |    |    |    |    |    |    |
|------------------------------|----|----|----|----|----|----|----|----|----|----|
| WL/connection (m3/conn/year) | 61 | 62 | 63 | 64 | 65 | 66 | 67 | 68 | 69 | 70 |
|------------------------------|----|----|----|----|----|----|----|----|----|----|

|                                    |       |       |       |       |       |       |       |       |       |       |
|------------------------------------|-------|-------|-------|-------|-------|-------|-------|-------|-------|-------|
| WL control cost (thousand EUR)     | 1,288 | 1,255 | 1,224 | 1,194 | 1,165 | 1,137 | 1,110 | 1,085 | 1,060 | 1,036 |
| Value of water lost (thousand EUR) | 3,599 | 3,630 | 3,661 | 3,692 | 3,723 | 3,754 | 3,785 | 3,816 | 3,847 | 3,878 |
| Total cost (thousand EUR)          | 4,886 | 4,885 | 4,884 | 4,885 | 4,888 | 4,891 | 4,895 | 4,901 | 4,907 | 4,914 |

Water loss control cost decrease 20%

|                                   |       |         |         |         |       |       |       |       |       |       |
|-----------------------------------|-------|---------|---------|---------|-------|-------|-------|-------|-------|-------|
| WL/connection<br>(m3/conn/year)   | 60    | 61      | 62      | 63      | 64    | 65    | 66    | 67    | 68    | 69    |
| WL control cost (thousand EUR)    | 1,057 | 1,030   | 1,004   | 979     | 955   | 932   | 910   | 888   | 868   | 848   |
| Cost of water lost (thousand EUR) | 2,973 | 2,999   | 3,025   | 3,050   | 3,076 | 3,102 | 3,128 | 3,154 | 3,180 | 3,206 |
| Total cost (thousand EUR)         | 4,030 | 4,028.9 | 4,028.6 | 4,029.4 | 4,031 | 4,034 | 4,038 | 4,042 | 4,048 | 4,054 |

Water loss control cost decrease 10%

|                                 |       |       |       |       |       |       |       |     |     |     |
|---------------------------------|-------|-------|-------|-------|-------|-------|-------|-----|-----|-----|
| WL/connection<br>(m3/conn/year) | 60    | 61    | 62    | 63    | 64    | 65    | 66    | 67  | 68  | 69  |
| WL control cost (thousand EUR)  | 1,190 | 1,159 | 1,130 | 1,101 | 1,074 | 1,048 | 1,023 | 999 | 976 | 954 |

|                                   |       |       |       |       |       |       |       |       |       |       |
|-----------------------------------|-------|-------|-------|-------|-------|-------|-------|-------|-------|-------|
| Cost of water lost (thousand EUR) | 2,973 | 2,999 | 3,025 | 3,050 | 3,076 | 3,102 | 3,128 | 3,154 | 3,180 | 3,206 |
| Total cost (thousand EUR)         | 4,162 | 4,158 | 4,154 | 4,152 | 4,151 | 4,150 | 4,151 | 4,153 | 4,156 | 4,160 |

Water loss control cost increase 10%

|                                   |       |       |       |       |       |       |       |       |       |       |
|-----------------------------------|-------|-------|-------|-------|-------|-------|-------|-------|-------|-------|
| WL/connection (m3/conn/year)      | 65    | 66    | 67    | 68    | 69    | 70    | 71    | 72    | 73    | 74    |
| WL control cost (thousand EUR)    | 1,281 | 1,251 | 1,221 | 1,193 | 1,166 | 1,140 | 1,114 | 1,090 | 1,067 | 1,044 |
| Cost of water lost (thousand EUR) | 3,102 | 3,128 | 3,154 | 3,180 | 3,206 | 3,232 | 3,258 | 3,283 | 3,309 | 3,335 |
| Total cost (thousand EUR)         | 4,383 | 4,379 | 4,375 | 4,373 | 4,372 | 4,371 | 4,372 | 4,373 | 4,376 | 4,379 |

Water loss control cost increase 20%

|                                |       |       |       |       |       |       |       |       |       |       |
|--------------------------------|-------|-------|-------|-------|-------|-------|-------|-------|-------|-------|
| WL/connection (m3/conn/year)   | 65    | 66    | 67    | 68    | 69    | 70    | 71    | 72    | 73    | 74    |
| WL control cost (thousand EUR) | 1,398 | 1,364 | 1,332 | 1,301 | 1,272 | 1,243 | 1,216 | 1,189 | 1,163 | 1,139 |



|                                   |       |       |       |       |       |       |          |          |          |       |
|-----------------------------------|-------|-------|-------|-------|-------|-------|----------|----------|----------|-------|
| Cost of water lost (thousand EUR) | 3,102 | 3,128 | 3,154 | 3,180 | 3,206 | 3,232 | 3,258    | 3,283    | 3,309    | 3,335 |
| Total cost (thousand EUR)         | 4,500 | 4,492 | 4,486 | 4,481 | 4,478 | 4,475 | 4,473.19 | 4,472.50 | 4,472.74 | 4,474 |

## B. Sensitivity analysis of ELWL: marginal cost method

### B.1. Change in the marginal cost of water

Curve equation from figure 3:  $y = 3.4146 e^{-0.038x}$

where:  $y$  = marginal cost of water (EUR/m<sup>3</sup>)

$x$  = ELWL (m<sup>3</sup>/conn/year)

From the equation, it can be derived that  $x = (1.228 - \ln y)/0.038$

| Marginal cost of water |                    | ELWL<br>(m <sup>3</sup> /conn/year) |
|------------------------|--------------------|-------------------------------------|
| Value<br>changed       | EUR/m <sup>3</sup> |                                     |
| -20%                   | 0.208              | 73.6                                |
| -10%                   | 0.234              | 70.5                                |
| 0%                     | 0.26               | 67.8                                |
| 10%                    | 0.286              | 65.3                                |

|     |       |      |
|-----|-------|------|
| 20% | 0.312 | 63.0 |
|-----|-------|------|

## B.II. Change in the Water Loss Control Cost

The curve equation changes when the water loss control cost changes. The ELWL is calculated from that equation with the same  $\gamma$  (marginal cost of water) value; that is, 0.26.

| Marginal cost curve              |                         | ELWL<br>(m <sup>3</sup> /conn/year) |
|----------------------------------|-------------------------|-------------------------------------|
| WL control cost<br>value changed | Equation                |                                     |
| -20%                             | $y = 2.7317e^{-0.038x}$ | 61.9                                |
| -10%                             | $y = 3.0731e^{-0.038x}$ | 65.0                                |
| 0%                               | $y = 3.4146e^{-0.038x}$ | 67.8                                |
| 10%                              | $y = 3.756e^{-0.038x}$  | 70.3                                |
| 20%                              | $y = 4.0975e^{-0.038x}$ | 72.6                                |

## C. Sensitivity analysis on ELWL: Cumulative cost–benefit method

Figure S3. Cumulative cost and benefit curve : tariff increase 20%

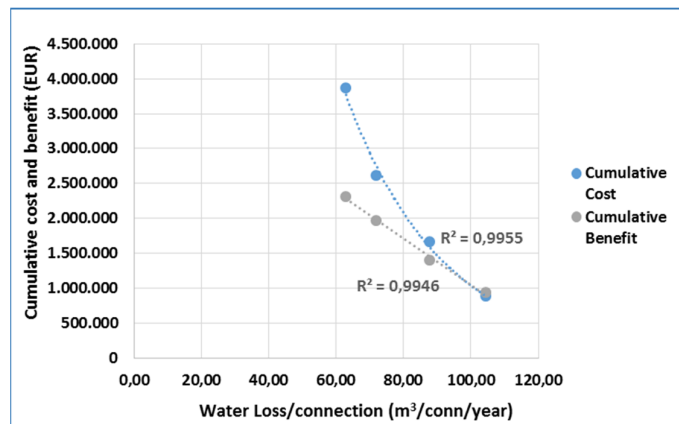

Figure SError! No text of specified style in document.. Cumulative cost and benefit curve:  
water loss control cost decrease 5%

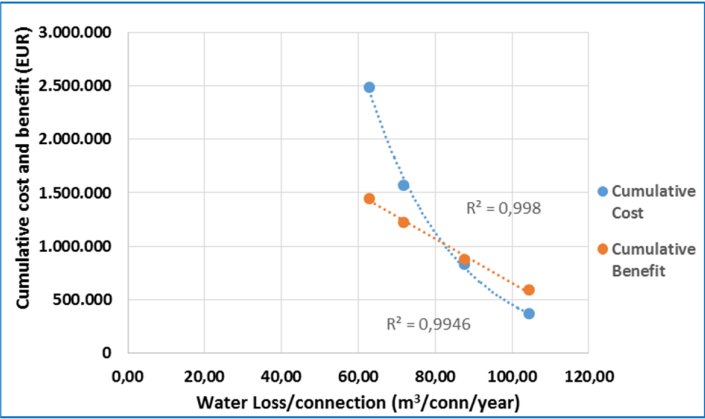

#### D. Sensitivity analysis on ELL: Total cost method

Cost of Production decrease 20%

|                                                 |       |       |       |       |       |       |       |       |       |       |       |       |       |       |
|-------------------------------------------------|-------|-------|-------|-------|-------|-------|-------|-------|-------|-------|-------|-------|-------|-------|
| Real Loss Volume (million m <sup>3</sup> /year) | 2.00  | 3.00  | 4.00  | 4.2   | 4.4   | 4.60  | 4.8   | 5     | 5.2   | 5.4   | 5.93  | 8.05  | 8.63  | 9.32  |
| Real loss control cost (thousand EUR)           | 2,590 | 1,630 | 1,174 | 1,110 | 1,053 | 1,000 | 953   | 910   | 870   | 833   | 749   | 661   | 472   | 385   |
| Cost of lost water (thousand EUR)               | 416   | 624   | 832   | 874   | 915   | 958   | 998   | 1,040 | 1,082 | 1,123 | 1,233 | 1,674 | 1,795 | 1,939 |
| Total cost (thousan EUR)                        | 3,006 | 2,254 | 2,006 | 1,984 | 1,968 | 1,957 | 1,951 | 1,950 | 1,951 | 1,956 | 1,982 | 2,335 | 2,267 | 2,324 |

Cost of Production decrease 10%

|                                                 |       |       |       |       |       |       |       |       |       |       |       |       |       |       |
|-------------------------------------------------|-------|-------|-------|-------|-------|-------|-------|-------|-------|-------|-------|-------|-------|-------|
| Real Loss Volume (million m <sup>3</sup> /year) | 2.00  | 3.00  | 4.00  | 4.2   | 4.4   | 4.60  | 4.8   | 5     | 5.2   | 5.4   | 5.93  | 8.05  | 8.63  | 9.32  |
| Real loss control cost (thousand EUR)           | 2,590 | 1,630 | 1,174 | 1,110 | 1,053 | 1,000 | 953   | 910   | 870   | 833   | 749   | 661   | 472   | 385   |
| Cost of lost water (thousand EUR)               | 468   | 702   | 936   | 983   | 1,030 | 1,077 | 1,123 | 1,170 | 1,217 | 1,264 | 1,387 | 1,883 | 2,019 | 2,181 |
| Total cost (thousan EUR)                        | 3,058 | 2,332 | 2,110 | 2,093 | 2,082 | 2,077 | 2,076 | 2,080 | 2,087 | 2,097 | 2,137 | 2,545 | 2,491 | 2,566 |

Cost of Production increase 10%

|                                                 |      |      |      |     |     |      |     |   |     |     |      |      |      |      |
|-------------------------------------------------|------|------|------|-----|-----|------|-----|---|-----|-----|------|------|------|------|
| Real Loss Volume (million m <sup>3</sup> /year) | 2.00 | 3.00 | 4.00 | 4.1 | 4.3 | 4.60 | 4.8 | 5 | 5.2 | 5.4 | 5.93 | 8.05 | 8.63 | 9.32 |
|-------------------------------------------------|------|------|------|-----|-----|------|-----|---|-----|-----|------|------|------|------|

|                                       |       |       |       |       |       |       |       |       |       |       |       |       |       |       |
|---------------------------------------|-------|-------|-------|-------|-------|-------|-------|-------|-------|-------|-------|-------|-------|-------|
| Real loss control cost (thousand EUR) | 2,590 | 1,630 | 1,174 | 1,141 | 1,081 | 1,000 | 953   | 910   | 870   | 833   | 749   | 661   | 472   | 385   |
| Cost of lost water (thousand EUR)     | 572   | 858   | 1,144 | 1,173 | 1,230 | 1,317 | 1,373 | 1,430 | 1,487 | 1,544 | 1,696 | 2,302 | 2,468 | 2,666 |
| Total cost (thousan EUR)              | 3,162 | 2,488 | 2,318 | 2,314 | 2,310 | 2,316 | 2,326 | 2,340 | 2,357 | 2,378 | 2,445 | 2,963 | 2,940 | 3,051 |

Cost of Production increase 20%

|                                                 |       |       |       |       |       |       |       |       |       |       |       |       |       |       |
|-------------------------------------------------|-------|-------|-------|-------|-------|-------|-------|-------|-------|-------|-------|-------|-------|-------|
| Real Loss Volume (million m <sup>3</sup> /year) | 2.00  | 3.00  | 4.00  | 4.1   | 4.3   | 4.60  | 4.8   | 5     | 5.2   | 5.4   | 5.93  | 8.05  | 8.63  | 9.32  |
| Real loss control cost (thousand EUR)           | 2,590 | 1,630 | 1,174 | 1,141 | 1,081 | 1,000 | 953   | 910   | 870   | 833   | 749   | 661   | 472   | 385   |
| Cost of lost water (thousand EUR)               | 624   | 936   | 1,248 | 1,279 | 1,342 | 1,436 | 1,498 | 1,560 | 1,622 | 1,685 | 1,850 | 2,511 | 2,692 | 2,908 |
| Total cost (thousan EUR)                        | 3,214 | 2,566 | 2,422 | 2,420 | 2,422 | 2,436 | 2,451 | 2,470 | 2,492 | 2,518 | 2,599 | 3,172 | 3,164 | 3,293 |

Real loss control cost decrease 20%

|                                                 |      |      |      |     |     |      |     |   |     |     |      |      |      |      |
|-------------------------------------------------|------|------|------|-----|-----|------|-----|---|-----|-----|------|------|------|------|
| Real Loss Volume (million m <sup>3</sup> /year) | 2.00 | 3.00 | 4.10 | 4.2 | 4.4 | 4.60 | 4.8 | 5 | 5.2 | 5.4 | 5.93 | 8.05 | 8.63 | 9.32 |
|-------------------------------------------------|------|------|------|-----|-----|------|-----|---|-----|-----|------|------|------|------|

|                                       |           |           |           |           |           |           |           |           |           |           |           |           |           |           |
|---------------------------------------|-----------|-----------|-----------|-----------|-----------|-----------|-----------|-----------|-----------|-----------|-----------|-----------|-----------|-----------|
| Real loss control cost (thousand EUR) | 2,07<br>2 | 1,30<br>4 | 913       | 888       | 842       | 800       | 762       | 728       | 696       | 667       | 599       | 423       | 390       | 357       |
| Cost of lost water (thousand EUR)     | 520       | 780       | 1,06<br>6 | 1,09<br>2 | 1,14<br>4 | 1,19<br>7 | 1,24<br>8 | 1,30<br>0 | 1,35<br>2 | 1,40<br>4 | 1,54<br>1 | 2,09<br>3 | 2,24<br>4 | 2,42<br>3 |
| Total cost (thousand EUR)             | 2,59<br>2 | 2,08<br>4 | 1,97<br>9 | 1,98<br>0 | 1,98<br>6 | 1,99<br>7 | 2,01<br>0 | 2,02<br>8 | 2,04<br>8 | 2,07<br>1 | 2,14<br>1 | 2,51<br>5 | 2,63<br>4 | 2,78<br>1 |

Real loss control cost decrease 10%

|                                                 |           |           |           |           |           |           |           |           |           |           |           |           |           |           |
|-------------------------------------------------|-----------|-----------|-----------|-----------|-----------|-----------|-----------|-----------|-----------|-----------|-----------|-----------|-----------|-----------|
| Real Loss Volume (million m <sup>3</sup> /year) | 2.00      | 3.00      | 4.00      | 4.1       | 4.3       | 4.60      | 4.8       | 5         | 5.2       | 5.4       | 5.93      | 8.05      | 8.63      | 9.32      |
| Real loss control cost (thousand EUR)           | 2,33<br>1 | 1,46<br>7 | 1,05<br>6 | 1,02<br>7 | 973       | 900       | 858       | 819       | 783       | 750       | 674       | 475       | 439       | 402       |
| Cost of lost water (thousand EUR)               | 520       | 780       | 1,04<br>0 | 1,06<br>6 | 1,11<br>8 | 1,19<br>7 | 1,24<br>8 | 1,30<br>0 | 1,35<br>2 | 1,40<br>4 | 1,54<br>1 | 2,09<br>3 | 2,24<br>4 | 2,42<br>3 |
| Total cost (thousand EUR)                       | 2,85<br>1 | 2,24<br>7 | 2,09<br>6 | 2,09<br>3 | 2,09<br>1 | 2,09<br>7 | 2,10<br>6 | 2,11<br>9 | 2,13<br>5 | 2,15<br>4 | 2,21<br>5 | 2,56<br>8 | 2,68<br>3 | 2,82<br>5 |

Real loss control cost increase 10%

|                                                 |       |       |       |       |       |       |       |       |       |       |       |       |       |       |
|-------------------------------------------------|-------|-------|-------|-------|-------|-------|-------|-------|-------|-------|-------|-------|-------|-------|
| Real Loss Volume (million m <sup>3</sup> /year) | 2.00  | 3.00  | 4.00  | 4.1   | 4.3   | 4.60  | 4.8   | 5     | 5.2   | 5.4   | 5.93  | 8.05  | 8.63  | 9.32  |
| Real loss control cost (thousand EUR)           | 2,849 | 1,793 | 1,291 | 1,255 | 1,189 | 1,099 | 1,048 | 1,001 | 957   | 916   | 824   | 581   | 537   | 491   |
| Cost of lost water (thousand EUR)               | 520   | 780   | 1,040 | 1,066 | 1,118 | 1,197 | 1,248 | 1,300 | 1,352 | 1,404 | 1,541 | 2,093 | 2,244 | 2,423 |
| Total cost (thousand EUR)                       | 3,369 | 2,573 | 2,331 | 2,321 | 2,307 | 2,297 | 2,296 | 2,301 | 2,309 | 2,320 | 2,365 | 2,674 | 2,780 | 2,915 |

Real loss control cost increase 20%

|                                                 |       |       |       |       |       |       |       |       |       |       |       |       |       |       |
|-------------------------------------------------|-------|-------|-------|-------|-------|-------|-------|-------|-------|-------|-------|-------|-------|-------|
| Real Loss Volume (million m <sup>3</sup> /year) | 2.00  | 3.00  | 4.00  | 4.1   | 4.3   | 4.60  | 4.7   | 4.9   | 5.2   | 5.4   | 5.93  | 8.05  | 8.63  | 9.32  |
| Real loss control cost (thousand EUR)           | 3,108 | 1,956 | 1,408 | 1,369 | 1,297 | 1,199 | 1,172 | 1,117 | 1,044 | 1,000 | 899   | 634   | 585   | 536   |
| Cost of lost water (thousand EUR)               | 520   | 780   | 1,040 | 1,066 | 1,118 | 1,197 | 1,222 | 1,274 | 1,352 | 1,404 | 1,541 | 2,093 | 2,244 | 2,423 |
| Total cost (thousand EUR)                       | 3,628 | 2,736 | 2,448 | 2,435 | 2,415 | 2,397 | 2,394 | 2,391 | 2,396 | 2,404 | 2,440 | 2,726 | 2,829 | 2,959 |



## E. Sensitivity analysis on ELAL: Economic meter inaccuracies

### E.1. Water tariff decrease 20%

|                          |       |        |
|--------------------------|-------|--------|
| Price of the meter       | 26.67 | EUR    |
| Cost of installation     | 3     | EUR    |
| Administration cost      | 3     | EUR    |
| Average consumption/year | 240   | m3     |
| Water tariff             | 0.272 | EUR/m3 |

| Year | Weighed error | Cost of Lost Water | Cumulative Cost of Lost Water | Annual Cost of Lost Water | Annual Cost of Meter | Total Annual Cost |
|------|---------------|--------------------|-------------------------------|---------------------------|----------------------|-------------------|
| 1    | 0.10%         | -                  | €0.07                         | €0.07                     | €32.67               | €32.73            |
| 2    | 0.20%         | 0.131              | €0.20                         | €0.10                     | €16.33               | €16.43            |
| 3    | 0.30%         | 0.196              | €0.39                         | €0.13                     | €10.89               | €11.02            |
| 4    | 0.50%         | 0.326              | €0.72                         | €0.18                     | €8.17                | €8.35             |
| 5    | 0.80%         | 0.522              | €1.24                         | €0.25                     | €6.53                | €6.78             |
| 6    | 3.00%         | 1.958              | €3.20                         | €0.53                     | €5.44                | €5.98             |
| 7    | 5.00%         | 3.264              | €6.46                         | €0.92                     | €4.67                | €5.59             |
| 8    | 7.50%         | 4.896              | €11.36                        | €1.42                     | €4.08                | €5.50             |
| 9    | 9.00%         | 5.875              | €17.23                        | €1.91                     | €3.63                | €5.54             |
| 10   | 11.00%        | 7.181              | €24.41                        | €2.44                     | €3.27                | €5.71             |
| 11   | 13.00%        | 8.486              | €32.90                        | €2.99                     | €2.97                | €5.96             |

Economic Replacement Frequency      8      years

Economic meter

inaccuracy      2.18%

E.2 Water tariff decrease 10%

|                          |       |        |
|--------------------------|-------|--------|
| Price of the meter       | 26.67 | EUR    |
| Cost of installation     | 3     | EUR    |
| Administration cost      | 3     | EUR    |
| Average consumption/year | 240   | m3     |
| Water tariff             | 0.306 | EUR/m3 |

| Year | Weighed error | Cost of Lost Water | Cumulative Cost of Lost Water | Annual Cost of Lost Water | Annual Cost of Meter | Total Annual Cost |
|------|---------------|--------------------|-------------------------------|---------------------------|----------------------|-------------------|
| 1    | 0.10%         | -                  | €0.07                         | €0.07                     | €32.67               | €32.74            |

|    |        |       |        |       |        |        |
|----|--------|-------|--------|-------|--------|--------|
| 2  | 0.20%  | 0.147 | €0.22  | €0.11 | €16.33 | €16.44 |
| 3  | 0.30%  | 0.220 | €0.44  | €0.15 | €10.89 | €11.04 |
| 4  | 0.50%  | 0.367 | €0.81  | €0.20 | €8.17  | €8.37  |
| 5  | 0.80%  | 0.588 | €1.40  | €0.28 | €6.53  | €6.81  |
| 6  | 3.00%  | 2.203 | €3.60  | €0.60 | €5.44  | €6.04  |
| 7  | 5.00%  | 3.672 | €7.27  | €1.04 | €4.67  | €5.71  |
| 8  | 7.50%  | 5.508 | €12.78 | €1.60 | €4.08  | €5.68  |
| 9  | 9.00%  | 6.610 | €19.39 | €2.15 | €3.63  | €5.78  |
| 10 | 11.00% | 8.078 | €27.47 | €2.75 | €3.27  | €6.01  |
| 11 | 13.00% | 9.547 | €37.01 | €3.36 | €2.97  | €6.33  |

Economic Replacement

Frequency 8 years

Economic meter

inaccuracy 2.18%

### E.3 Water tariff increase 10%

|                          |       |        |
|--------------------------|-------|--------|
| Price of the meter       | 26.67 | EUR    |
| Cost of installation     | 3     | EUR    |
| Administration cost      | 3     | EUR    |
| Average consumption/year | 240   | m3     |
| Water tariff             | 0.374 | EUR/m3 |

| Year | Weigthed error | Cost of Lost Water | Cumulative Cost of Lost Water | Annual Cost of Lost Water | Annual Cost of Meter | Total Annual Cost |
|------|----------------|--------------------|-------------------------------|---------------------------|----------------------|-------------------|
| 1    | 0.10%          | -                  | €0.09                         | €0.09                     | €32.67               | €32.76            |
| 2    | 0.20%          | 0.180              | €0.27                         | €0.13                     | €16.33               | €16.47            |
| 3    | 0.30%          | 0.269              | €0.54                         | €0.18                     | €10.89               | €11.07            |
| 4    | 0.50%          | 0.449              | €0.99                         | €0.25                     | €8.17                | €8.41             |
| 5    | 0.80%          | 0.718              | €1.71                         | €0.34                     | €6.53                | €6.87             |
| 6    | 3.00%          | 2.693              | €4.40                         | €0.73                     | €5.44                | €6.18             |
| 7    | 5.00%          | 4.488              | €8.89                         | €1.27                     | €4.67                | €5.94             |
| 8    | 7.50%          | 6.732              | €15.62                        | €1.95                     | €4.08                | €6.04             |
| 9    | 9.00%          | 8.078              | €23.70                        | €2.63                     | €3.63                | €6.26             |
| 10   | 11.00%         | 9.874              | €33.57                        | €3.36                     | €3.27                | €6.62             |
| 11   | 13.00%         | 11.669             | €45.24                        | €4.11                     | €2.97                | €7.08             |

Economic Replacement Frequency      7      years

Economic meter

inaccuracy

1.41%

#### E.4 Water tariff increase 20%

|                             |       |        |
|-----------------------------|-------|--------|
| Price of the meter          | 26.67 | EUR    |
| Cost of installation        | 3     | EUR    |
| Administration cost         | 3     | EUR    |
| Average<br>consumption/year | 240   | m3     |
| Water tariff                | 0.408 | EUR/m3 |

| Year | Weighed error | Cost of Lost Water | Cumulative Cost of Lost Water | Annual Cost of Lost Water | Annual Cost of Meter | Total Annual Cost |
|------|---------------|--------------------|-------------------------------|---------------------------|----------------------|-------------------|
| 1    | 0.10%         | -                  | €0.10                         | €0.10                     | €32.67               | €32.76            |
| 2    | 0.20%         | 0.196              | €0.29                         | €0.15                     | €16.33               | €16.48            |
| 3    | 0.30%         | 0.294              | €0.59                         | €0.20                     | €10.89               | €11.08            |
| 4    | 0.50%         | 0.490              | €1.08                         | €0.27                     | €8.17                | €8.44             |
| 5    | 0.80%         | 0.783              | €1.86                         | €0.37                     | €6.53                | €6.91             |
| 6    | 3.00%         | 2.938              | €4.80                         | €0.80                     | €5.44                | €6.24             |
| 7    | 5.00%         | 4.896              | €9.69                         | €1.38                     | €4.67                | €6.05             |
| 8    | 7.50%         | 7.344              | €17.04                        | €2.13                     | €4.08                | €6.21             |
| 9    | 9.00%         | 8.813              | €25.85                        | €2.87                     | €3.63                | €6.50             |
| 10   | 11.00%        | 10.771             | €36.62                        | €3.66                     | €3.27                | €6.93             |
| 11   | 13.00%        | 12.730             | €49.35                        | €4.49                     | €2.97                | €7.46             |

Economic Replacement Frequency      7      years

Economic meter

inaccuracy      1.41%

#### E.5 Meter price decrease 20%

|                          |       |        |
|--------------------------|-------|--------|
| Price of the meter       | 21.33 | EUR    |
| Cost of installation     | 3     | EUR    |
| Administration cost      | 3     | EUR    |
| Average consumption/year | 240   | m3     |
| Water tariff             | 0.34  | EUR/m3 |

| Year | Weigthed error | Cost of Lost Water | Cumulative Cost of Lost Water | Annual Cost of Lost Water | Annual Cost of Meter | Total Annual Cost |
|------|----------------|--------------------|-------------------------------|---------------------------|----------------------|-------------------|
| 1    | 0.10%          | -                  | €0.08                         | €0.08                     | €27.33               | €27.41            |
| 2    | 0.20%          | 0.163              | €0.24                         | €0.12                     | €13.67               | €13.79            |
| 3    | 0.30%          | 0.245              | €0.49                         | €0.16                     | €9.11                | €9.27             |
| 4    | 0.50%          | 0.408              | €0.90                         | €0.22                     | €6.83                | €7.06             |
| 5    | 0.80%          | 0.653              | €1.55                         | €0.31                     | €5.47                | €5.78             |
| 6    | 3.00%          | 2.448              | €4.00                         | €0.67                     | €4.56                | €5.22             |
| 7    | 5.00%          | 4.080              | €8.08                         | €1.15                     | €3.90                | €5.06             |
| 8    | 7.50%          | 6.120              | €14.20                        | €1.77                     | €3.42                | €5.19             |
| 9    | 9.00%          | 7.344              | €21.54                        | €2.39                     | €3.04                | €5.43             |
| 10   | 11.00%         | 8.976              | €30.52                        | €3.05                     | €2.73                | €5.79             |
| 11   | 13.00%         | 10.608             | €41.13                        | €3.74                     | €2.48                | €6.22             |

Economic Replacement Frequency            7            years

Economic meter

inaccuracy                                            1.41%

#### E.6 Meter price decrease 10%

|                             |       |        |
|-----------------------------|-------|--------|
| Price of the meter          | 24.00 | EUR    |
| Cost of installation        | 3     | EUR    |
| Administration cost         | 3     | EUR    |
| Average<br>consumption/year | 240   | m3     |
| Water tariff                | 0.34  | EUR/m3 |



| Year | Weighed error | Cost of Lost Water | Cumulative Cost of Lost Water | Annual Cost of Lost Water | Annual Cost of Meter | Total Annual Cost |
|------|---------------|--------------------|-------------------------------|---------------------------|----------------------|-------------------|
| 1    | 0.10%         | -                  | €0.08                         | €0.08                     | €30.00               | €30.08            |
| 2    | 0.20%         | 0.163              | €0.24                         | €0.12                     | €15.00               | €15.12            |
| 3    | 0.30%         | 0.245              | €0.49                         | €0.16                     | €10.00               | €10.16            |
| 4    | 0.50%         | 0.408              | €0.90                         | €0.22                     | €7.50                | €7.72             |
| 5    | 0.80%         | 0.653              | €1.55                         | €0.31                     | €6.00                | €6.31             |
| 6    | 3.00%         | 2.448              | €4.00                         | €0.67                     | €5.00                | €5.67             |
| 7    | 5.00%         | 4.080              | €8.08                         | €1.15                     | €4.29                | €5.44             |
| 8    | 7.50%         | 6.120              | €14.20                        | €1.77                     | €3.75                | €5.52             |
| 9    | 9.00%         | 7.344              | €21.54                        | €2.39                     | €3.33                | €5.73             |
| 10   | 11.00%        | 8.976              | €30.52                        | €3.05                     | €3.00                | €6.05             |
| 11   | 13.00%        | 10.608             | €41.13                        | €3.74                     | €2.73                | €6.47             |

Economic Replacement Frequency      7      years

Economic meter

inaccuracy      1.41%

#### E.7 Meter price increase 10%

|                          |       |        |
|--------------------------|-------|--------|
| Price of the meter       | 29.33 | EUR    |
| Cost of installation     | 3     | EUR    |
| Administration cost      | 3     | EUR    |
| Average consumption/year | 240   | m3     |
| Water tariff             | 0.34  | EUR/m3 |

| Year | Weigthed error | Cost of Lost Water | Cumulative Cost of Lost Water | Annual Cost of Lost Water | Annual Cost of Meter | Total Annual Cost |
|------|----------------|--------------------|-------------------------------|---------------------------|----------------------|-------------------|
| 1    | 0.10%          | -                  | €0.08                         | €0.08                     | €35.33               | €35.41            |
| 2    | 0.20%          | 0.163              | €0.24                         | €0.12                     | €17.67               | €17.79            |
| 3    | 0.30%          | 0.245              | €0.49                         | €0.16                     | €11.78               | €11.94            |
| 4    | 0.50%          | 0.408              | €0.90                         | €0.22                     | €8.83                | €9.06             |
| 5    | 0.80%          | 0.653              | €1.55                         | €0.31                     | €7.07                | €7.38             |
| 6    | 3.00%          | 2.448              | €4.00                         | €0.67                     | €5.89                | €6.56             |
| 7    | 5.00%          | 4.080              | €8.08                         | €1.15                     | €5.05                | €6.20             |
| 8    | 7.50%          | 6.120              | €14.20                        | €1.77                     | €4.42                | €6.19             |
| 9    | 9.00%          | 7.344              | €21.54                        | €2.39                     | €3.93                | €6.32             |
| 10   | 11.00%         | 8.976              | €30.52                        | €3.05                     | €3.53                | €6.59             |
| 11   | 13.00%         | 10.608             | €41.13                        | €3.74                     | €3.21                | €6.95             |

Economic Replacement Frequency      8      years

Economic meter

inaccuracy      2.18%

E.8 Meter price increase 20%

|                             |       |        |
|-----------------------------|-------|--------|
| Price of the meter          | 32.00 | EUR    |
| Cost of installation        | 3     | EUR    |
| Administration cost         | 3     | EUR    |
| Average<br>consumption/year | 240   | m3     |
| Water tariff                | 0.34  | EUR/m3 |

| Year | Weighed error | Cost of Lost Water | Cumulative Cost of Lost Water | Annual Cost of Lost Water | Annual Cost of Meter | Total Annual Cost |
|------|---------------|--------------------|-------------------------------|---------------------------|----------------------|-------------------|
| 1    | 0.10%         | -                  | €0.08                         | €0.08                     | €38.00               | €38.08            |
| 2    | 0.20%         | 0.163              | €0.24                         | €0.12                     | €19.00               | €19.12            |
| 3    | 0.30%         | 0.245              | €0.49                         | €0.16                     | €12.67               | €12.83            |
| 4    | 0.50%         | 0.408              | €0.90                         | €0.22                     | €9.50                | €9.72             |
| 5    | 0.80%         | 0.653              | €1.55                         | €0.31                     | €7.60                | €7.91             |
| 6    | 3.00%         | 2.448              | €4.00                         | €0.67                     | €6.33                | €7.00             |
| 7    | 5.00%         | 4.080              | €8.08                         | €1.15                     | €5.43                | €6.58             |
| 8    | 7.50%         | 6.120              | €14.20                        | €1.77                     | €4.75                | €6.52             |
| 9    | 9.00%         | 7.344              | €21.54                        | €2.39                     | €4.22                | €6.62             |
| 10   | 11.00%        | 8.976              | €30.52                        | €3.05                     | €3.80                | €6.85             |
| 11   | 13.00%        | 10.608             | €41.13                        | €3.74                     | €3.45                | €7.19             |

Economic Replacement Frequency      8      years

Economic meter

inaccuracy      2.18%

## References

- Alkaseh, J. M. A., Adlan, M. N., Abustan, I., & Hanif, A. B. M. (2015). Achieving an economic leakage level in Kinta Valley, Malaysia. *Water Utility Journal*, 11, 31–47.
- Arregui, F., Cobacho, R., Soriano, J., & Garcia-Sera, J. (2010). Calculating the optimum level of apparent losses due to water meter inaccuracies. *Proceedings of the 2010 6th IWA Water Loss Reduction Specialist Conference*.
- Arregui, F. J., Cobacho, R., Soriano, J., & Jimenez-Redal, R. (2018). Calculation proposal for the economic level of apparent losses (ELAL) in a water supply system. *Water*, 10(12). <https://doi.org/10.3390/w10121809>
- Boretti, A., & Rosa, L. (2019). Reassessing the projections of the World Water Development Report. *Npj Clean Water*, 2(June). <https://doi.org/10.1038/s41545-019-0039-9>
- el-Ahmady, I. I., & Sembiring, E. (2014). Pemilihan Program Pengendalian Kehilangan Air Serta Pengaruh Implementasinya Terhadap Peningkatan Pendapatan Pdam. *Jurnal Teknik Lingkungan*, 20(2), 142–151. <https://doi.org/10.5614/jtl.2014.20.2.5>
- Evans, R. G., & Sadler, E. J. (2008). Methods and technologies to improve efficiency of water use. *Water Resources Research*, 44(7). <https://doi.org/10.1029/2007WR006200>
- Fanner, P., & Lambert, A. (2009). Calculating SRELL with pressure management, active leakage control and leak run-time options, with confidence limits. *The 5th IWA Water Loss Reduction Specialist Conference*.
- Farley, M., & Liemberger, R. (2005). Developing a non-revenue water reduction strategy: Planning and implementing the strategy. *Water Science and Technology: Water Supply*, 5(1), 41–50. <https://doi.org/10.2166/ws.2005.0006>
- Farley, Malcolm, Wyeth, G., Ghazali, Z. B. M., Istandar, A., & Singh, S. (2008). *The Manager's Non-Revenue Water Handbook Handbook: A Guide to Understanding Water Loses*. United States Agency for International Developing and Ranhill Utilities. [http://www.waterlinks.org/system/resources/W1siZiIsIjIwMTUvMDUvMDYvM2ZzOHhpbmw1N19OUldfTWFuYWdlcl9zX0hhbmRib29rLnBkZiJdXQ/NRW Manager's Handbook.pdf?sha=0a5d7a95ad85dcfb](http://www.waterlinks.org/system/resources/W1siZiIsIjIwMTUvMDUvMDYvM2ZzOHhpbmw1N19OUldfTWFuYWdlcl9zX0hhbmRib29rLnBkZiJdXQ/NRW%20Manager's%20Handbook.pdf?sha=0a5d7a95ad85dcfb)

- González-Gómez, F., García-Rubio, M. A., & Guardiola, J. (2011). Why is non-revenue water so high in so many cities? *International Journal of Water Resources Development*, 27(2), 345–360. <https://doi.org/10.1080/07900627.2010.548317>
- Heryanto, T. (2017). *Analysis of Economic Level of Water Losses in the Distribution System Case study in Indonesia* (Issue April). IHE Delft.
- Islam, M. S., & Babel, M. S. (2013). Economic analysis of leakage in the Bangkok water distribution system. *Journal of Water Resources Planning and Management*, 139(2), 209–216. [https://doi.org/10.1061/\(ASCE\)WR.1943-5452.0000235](https://doi.org/10.1061/(ASCE)WR.1943-5452.0000235)
- Jones, J. A. A. (2010). *Water Sustainability: A Global Perspective* (1st ed.). Routledge. <https://books.google.com/books?id=EwNSAwAAQBAJ&pgis=1>
- Kanakoudis, V., & Gonelas, K. (2015). Estimating the Economic Leakage Level in a Water Distribution System. *9th World Congress, EWRA 2015 "Water Resources Management in a Changing World: Challenges and Opportunities"*, June, 1–7.
- Kementerian PU. (2018). *BPPSPAM Perkenalkan Penurunan NRW Melalui Kontrak Berbasis Kinerja*. <https://pu.go.id/berita/view/16148/bppspam-perkenalkan-penurunan-nrw-melalui-kontrak-berbasis-kinerja>
- Lambert, A. O., & Fantozzi, M. (2005). Recent advances in calculating economic intervention frequency for active leakage control, and implications for calculation of economic leakage levels. *Water Science and Technology: Water Supply*, 5(6), 263–271. <https://doi.org/10.2166/ws.2005.0072>
- Lambert Allan. (2003). Assessing non-revenue water and its components: a practical approach. *Water 21 Mag. Int. Water Assoc*, 50–51. <http://www.iwahq.org.uk/template>.
- Lambert, Allan O. (2002). International report: Water losses management and techniques. *Water Science and Technology: Water Supply*, 2(4), 1–20. <https://doi.org/10.2166/ws.2002.0115>

- Liemberger, R., & Wyatt, A. (2019). Quantifying the global non-revenue water problem. *Water Science and Technology: Water Supply*, 19(3), 831–837. <https://doi.org/10.2166/ws.2018.129>
- Lim, E., Savic, D., & Kapelan, Z. (2015). Development of a leakage target setting approach for South Korea based on Economic Level of Leakage. *Procedia Engineering*, 119(1), 120–129. <https://doi.org/10.1016/j.proeng.2015.08.862>
- Muñoz-Trochez, C., Smout, I., & Kayaga, S. (2011). Economic level of leakage (ELL) calculation with limited data: An application in Zaragoza. *The Future of Water, Sanitation and Hygiene in Low-Income Countries: Innovation, Adaptation and Engagement in a Changing World - Proceedings of the 35th WEDC International Conference*, 7.
- Pearson, D., & Trow, S. (2005). Calculating economic levels of leakage. *IWA Water Loss 2005 Conference*.
- Tripartite group. (2002). *Best Practice Principles in the Economic Level of Leakage Calculation*.
- UKWIR. (1994). Managing leakage (Report C): Setting Economic Leakage Targets. In *UK Water Industry Research*. WRC Publications.
- United Nations. (2018). Sustainable Development Goal 6: Synthesis Report on Water and Sanitation. In *United Nations*. <https://doi.org/10.1126/science.278.5339.827>
- Veldkamp, T. I. E., Wada, Y., Aerts, J. C. J. H., Döll, P., Gosling, S. N., Liu, J., Masaki, Y., Oki, T., Ostberg, S., Pokhrel, Y., Satoh, Y., Kim, H., & Ward, P. J. (2017). Water scarcity hotspots travel downstream due to human interventions in the 20th and 21st century. *Nature Communications*, 8. <https://doi.org/10.1038/ncomms15697>
- Wu, Z. Y., Sage, P., & Turtle, D. (2010). Pressure-dependent leak detection model and its application to a district water system. *Journal of Water Resources Planning and Management*, 136(1), 116–128. [https://doi.org/10.1061/\(ASCE\)0733-9496\(2010\)136:1\(116\)](https://doi.org/10.1061/(ASCE)0733-9496(2010)136:1(116))
